# Supplementary material for: Removal of Hexavalent Chromium(VI) from Wastewater Using Chitosan-Coated Iron Oxide Nanocomposite Membranes
Source: MDPI journal article supplement (doi:10.3390/toxics10020098), 2022-02-19
Supplement: s1 [file s1]

# Supplementary Materials: Removal of Hexavalent Chromium(VI) from Wastewater Using Chitosan-coated Iron Oxide Nanocomposite Membranes

Jung Eun Park, Jun-Ho Shin, Wonzin Oh, Sang-June Choi, Jeongju Kim, Chorong Kim and Jongho Jeon

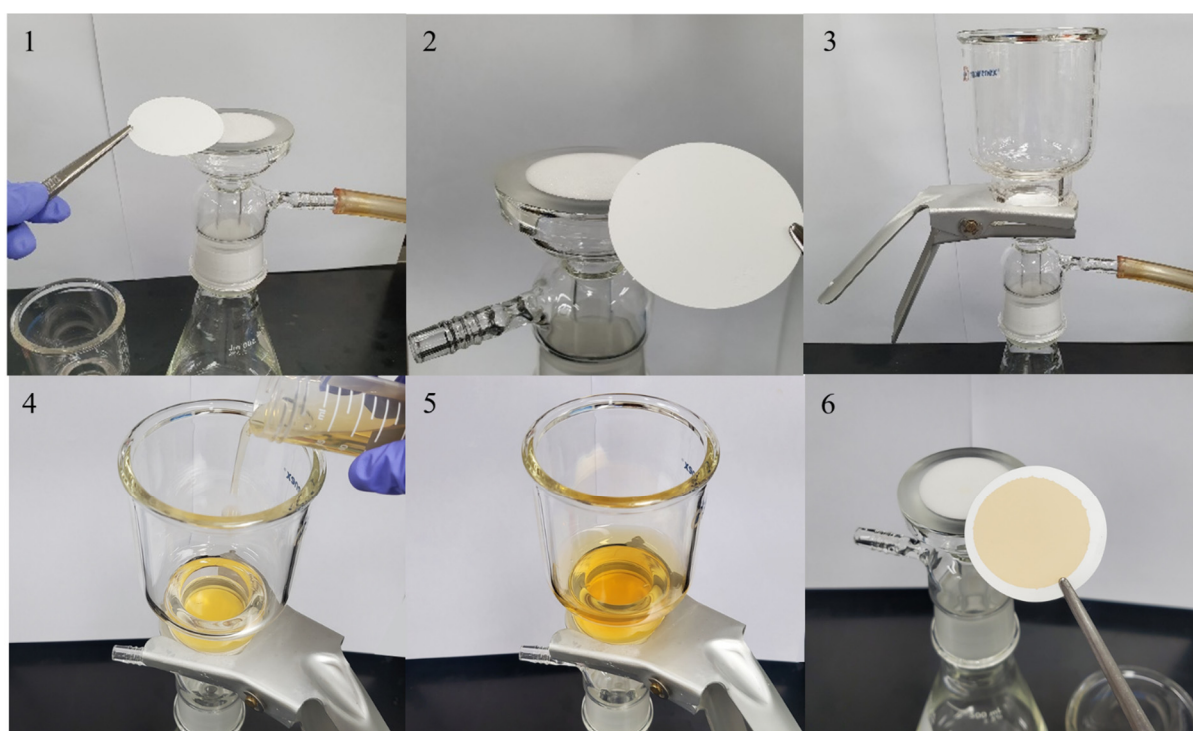

**Figure S1.** Procedure for the preparation of the composite membrane (Chi@Fe<sub>2</sub>O<sub>3</sub>-PVDF) via a vacuum filtration.

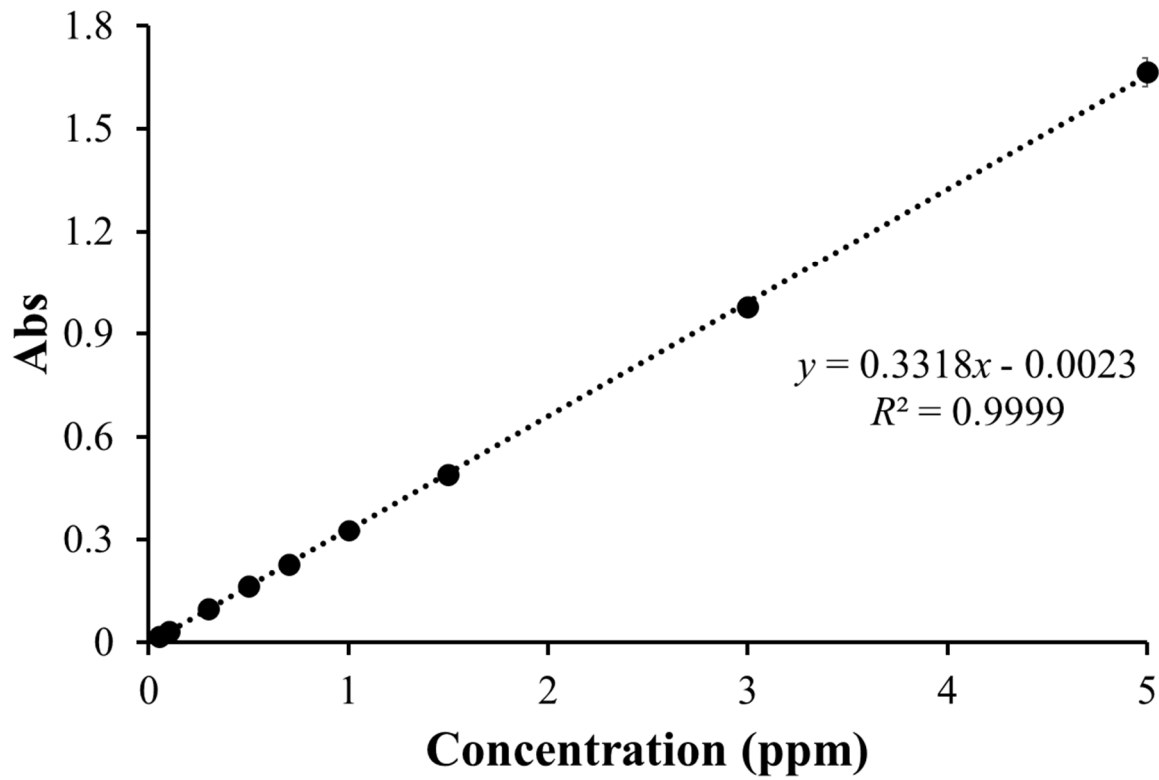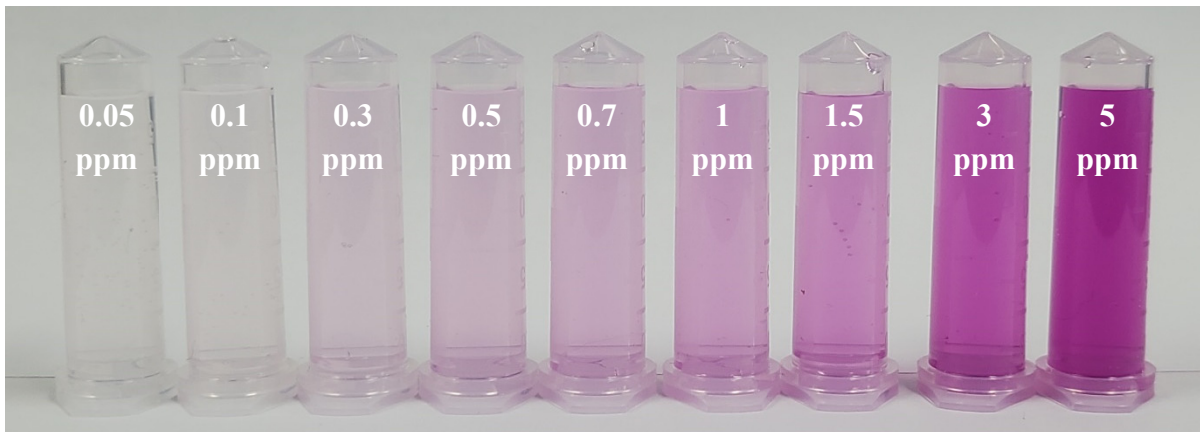

**Figure S2.** Linear relationship of the absorbance at 540 nm with the concentrations of Cr (VI) in water by the standard diphenylcarbazide method.

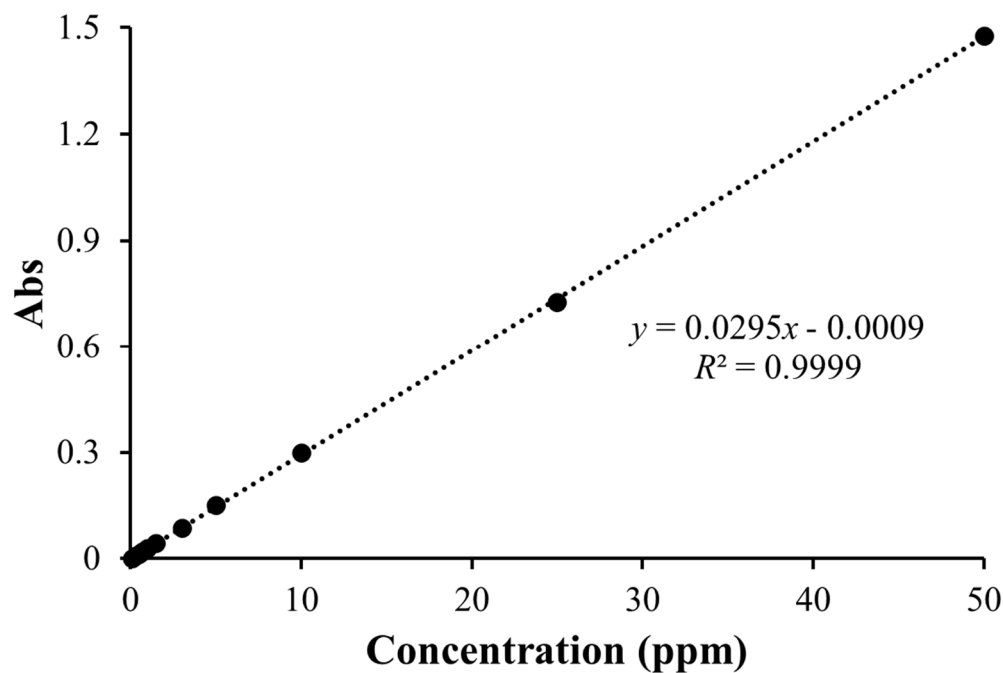

Figure S3. Linear relationship of the absorbance at 370 nm with the concentrations of Cr (VI) in water by direct method.

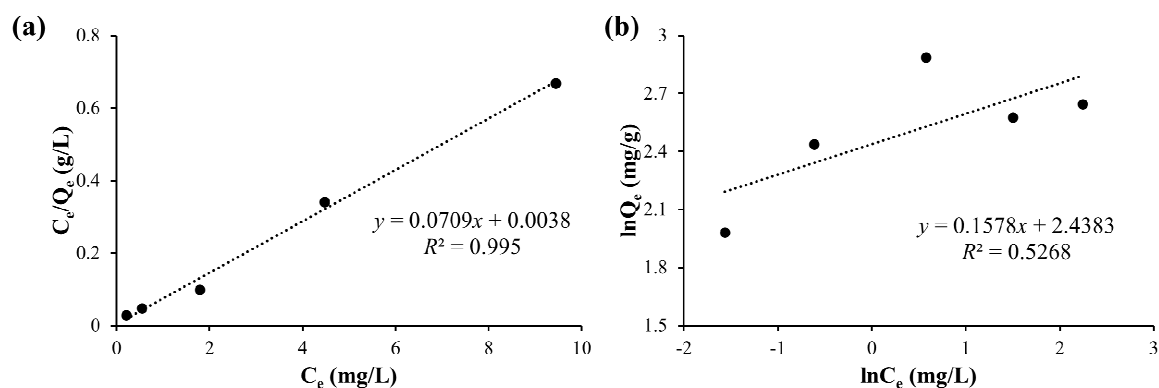

Figure S4. Adsorption isotherm for continuous in-flow experiment (a) Langmuir model, (b) Freundlich model.

Table S1. Comparison of other adsorption methods for the removal of Cr(VI) from aqueous solution.

| Adsorbent                                                        | Contact time (min) | Adsorption capacity (mg/g) | Ref              |
|------------------------------------------------------------------|--------------------|----------------------------|------------------|
| GO/MNO <sub>2</sub> /Fe <sub>3</sub> O <sub>4</sub> /Polypyrrole | 1500               | 374.53                     | 1                |
| Protonated crosslinked chitosan                                  | 60                 | 189.3                      | 2                |
| Deacetylated chitosan-coated magnetic adsorbent                  | 80                 | 24.66                      | 3                |
| Chi@Fe <sub>3</sub> O <sub>4</sub>                               | 250                | 142.38                     | 4                |
| Chi@Fe <sub>3</sub> O <sub>4</sub> GO                            | 250                | 100.51                     | 4                |
| Polypyrrole/OMWCNTs NCs                                          | 300                | 294.18                     | 5                |
| chitosan cross-linked with N,N-methylene-bis-acrylamide          | 60                 | 149                        | 6                |
| <b>Chi@Fe<sub>2</sub>O<sub>3</sub>-PVDF</b>                      | <b>0.25</b>        | <b>14.1</b>                | <b>This work</b> |

## References

1. Liu, W.; Yang, L.; Xu, S.; Chen, Y.; Liu, B.; Li, Z.; Jiang, C. Efficient removal of hexavalent chromium from water by an adsorption-reduction mechanism with sandwiched nanocomposites. *RSC Adv.* **2018**, *8*, 15087–15093, doi: 10.1039/C8RA01805G
2. Huang, R.; Yang, B.; Liu, Q. Removal of chromium(VI) Ions from aqueous solutions with protonated crosslinked chitosan. *J. Appl. Polym. Sci.* **2013**, *129*, 908–915, doi: 10.1002/app.38685
3. Ravi, T.; Anuradha Jabasingh, S. Preparation and characterization of higher degree-deacetylated chitosan-coated magnetic adsorbent for the removal of chromium(VI) from its aqueous mixture. *J. Appl. Polym. Sci.* **2017**, *135*, 45878, doi: 10.1002/app.45878
4. Subedi, N.; Lähde, A.; Abu-Danso, E.; Iqbal, J.; Bhatnagar, A. A comparative study of magnetic chitosan (Chi@Fe<sub>3</sub>O<sub>4</sub>) and graphene oxide modified magnetic chitosan (Chi@Fe<sub>3</sub>O<sub>4</sub>GO) nanocomposites for efficient removal of Cr(VI) from water. *Int. J. Biol. Macromol.* **2019**, *137*, 948–959, doi: 10.1016/j.ijbiomac.2019.06.151
5. Bhaumik, M.; Agarwal, S.; Gupta, V.K.; Maity, A. Enhanced removal of Cr(VI) from aqueous solutions using polypyrrole wrapped oxidized MWCNTs nanocomposites adsorbent. *J. Colloid Interface Sci.* **2016**, *470*, 257–267, doi: 10.1016/j.jcis.2016.02.054
6. Ismael, M.N.M.; El Nemr, A.; El Ashry, E.S.H.; Hamida, H.A. Removal of Hexavalent Chromium by Cross-Linking Chitosan and *N,N'*-Methylene Bis-Acrylamide. *Environ. Process.* **2020**, *7*, 911–930, doi: 10.1007/s40710-020-00447-2
